# Supplementary material for: A facile strategy to achieve high conduction and excellent chemical stability of lithium solid electrolytes
Source: Royal Society of Chemistry journal article supplement (doi:10.1039/c4ra11287c), 2014-12-19
Supplement: c4ra11287c1.pdf [file c4ra11287c1.pdf]

**Supplementary information**

**A Facile Strategy to Achieve High Conduction and Excellent Chemical Stability of Lithium**

**Solid Electrolytes**

Shufeng Song, Jia Lu, Feng Zheng, Hai M. Duong\*, and Li Lu\*

Materials Science Group, Department of Mechanical Engineering National University of

Singapore, Singapore 117575

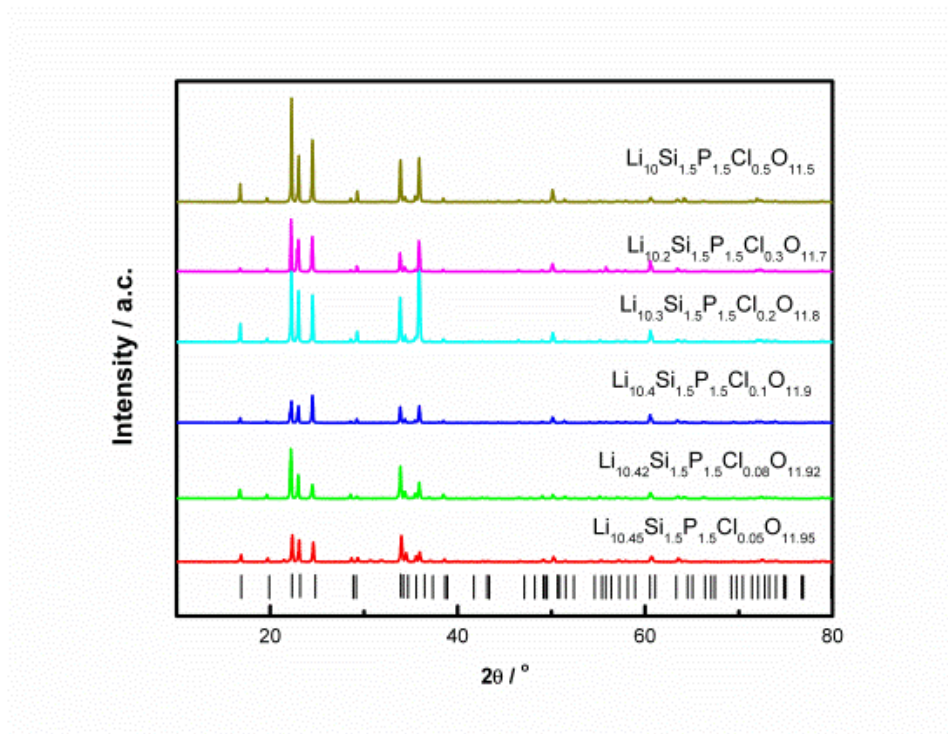

**Figure S1.** XRD patterns of  $\text{Li}_{10.5-x}\text{Si}_{1.5}\text{P}_{1.5}\text{Cl}_x\text{O}_{12-x}$  ( $0.05 \leq x \leq 0.5$ ). The short vertical lines below the profiles mark the peaks positions of  $\gamma\text{-Li}_3\text{PO}_4$  (PDF 15-0760).

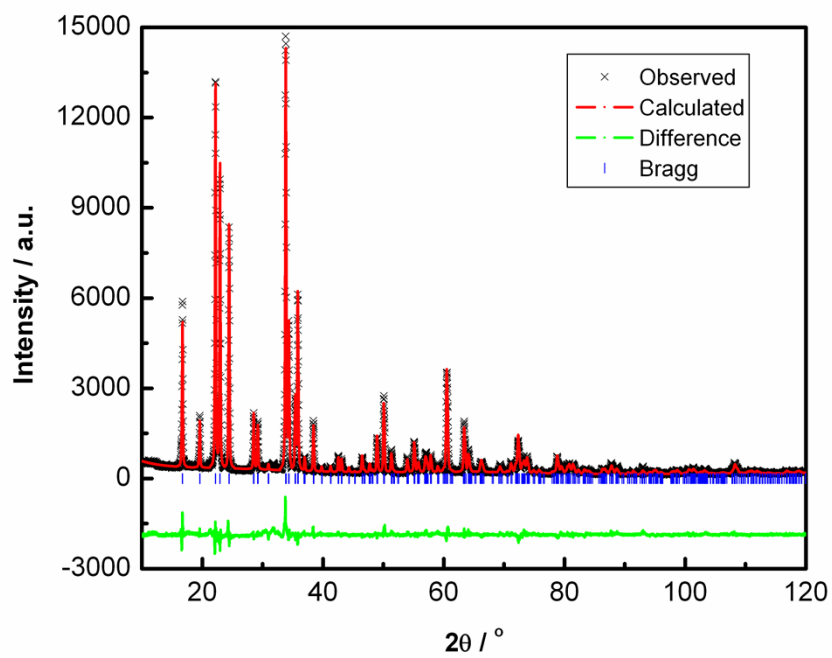

**Figure S2.** Typical observed, calculated, and difference patterns for Rietveld refinement of  $\text{Li}_{10}\text{Si}_{1.5}\text{P}_{1.5}\text{Cl}_{0.5}\text{O}_{11.5}$ .

**Table S1 Crystallographic data of  $\text{Li}_{10}\text{Si}_{1.5}\text{P}_{1.5}\text{Cl}_{0.5}\text{O}_{11.5}$  from Rietveld refinement of powder****XRD data**

| Atom            | Site | x, y, z                            | Occupancy | $U_{\text{iso}}$ |
|-----------------|------|------------------------------------|-----------|------------------|
| Li1             | 8d   | 0.29344(1), 0.50060(8), 0.17261(5) | 1.0       | 0.0575(9)        |
| Li2             | 4c   | 0.17171(3), 0.75, 0.44964(3)       | 1.0       | 0.0507(5)        |
| Li3             | 8d   | 0.02943(3), 0.42520(1), 0.12463(8) | 0.166(3)  | 0.0231(6)        |
| P               | 4c   | 0.35169(4), 0.25, 0.41858(5)       | 0.5       | 0.0251(6)        |
| Si              | 4c   | 0.31284(5), 0.25, 0.41102(7)       | 0.5       | 0.0023           |
| O1              | 8d   | 0.22783(2), 0.03067(6), 0.33983(1) | 0.916(3)  | 0.0062(5)        |
| O2              | 4c   | 0.28485(3), 0.25, 0.05236(2)       | 1.0       | 0.0122(4)        |
| O3              | 4c   | 0.15289(4), 0.75, 0.08424(5)       | 1.0       | 0.0131(6)        |
| Cl              | 8d   | 0.00554(6), 0.01025(6), 0.35014(3) | 0.083(8)  | 0.0969(9)        |
| $R_{\text{wp}}$ |      | 0.0787                             |           |                  |
| $R_{\text{p}}$  |      | 0.0638                             |           |                  |
| $\text{CHI}^2$  |      | 4.416                              |           |                  |
